# Supplementary material for: Responsiveness of monopodal postural stability tests in recreational athletes
Source: PeerJ journal article supplement (doi:10.7717/peerj.16765), 2024-01-11
Supplement: Appendix.pdf [file Appendix.pdf]

**Supplementary Appendix 1.** Flow chart of the study participants.

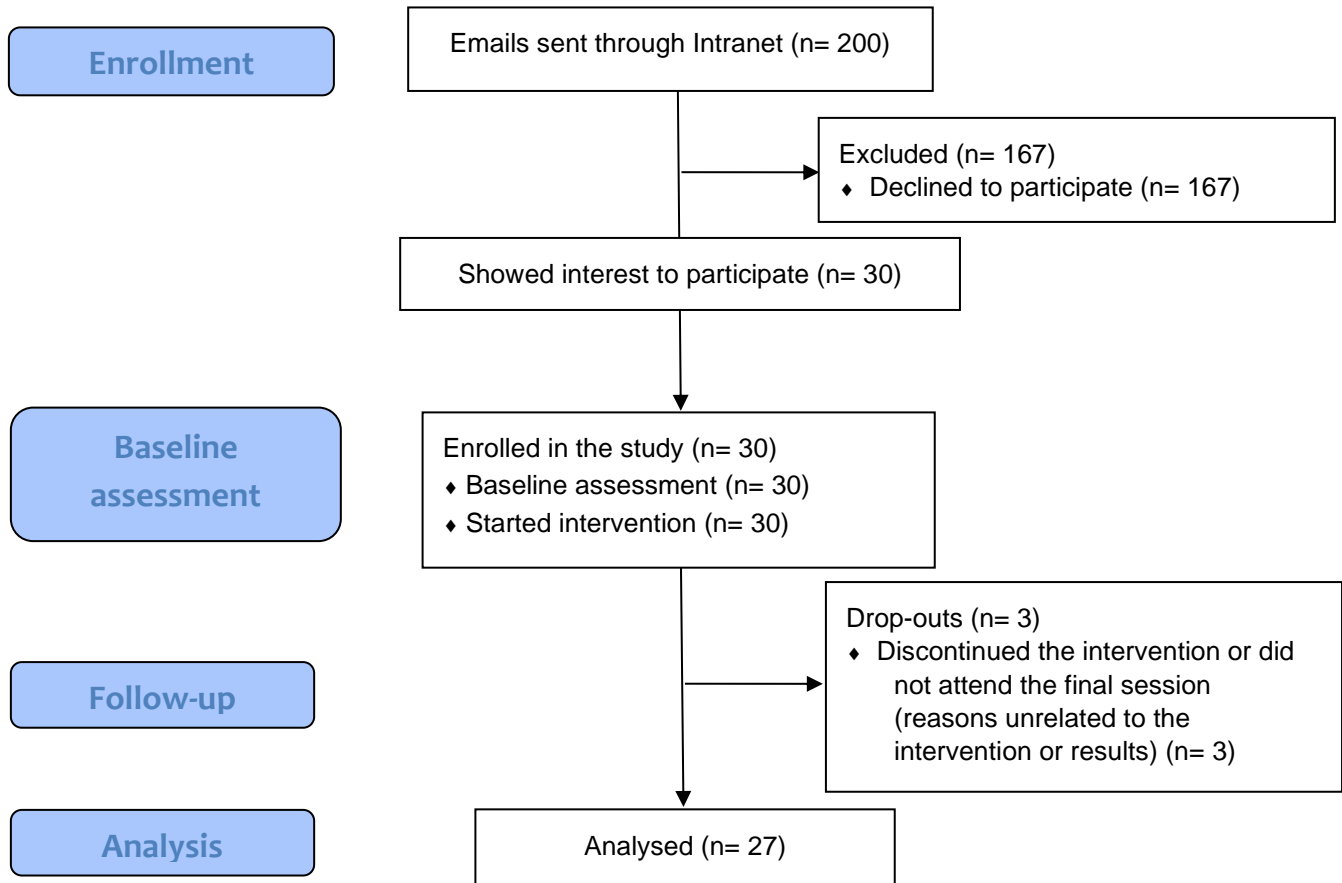

**Supplementary Appendix 2.** Individual values for all participants.

**Supplementary Appendix 2.1** Individual values for Emery Balance Test (dominant lower limb).

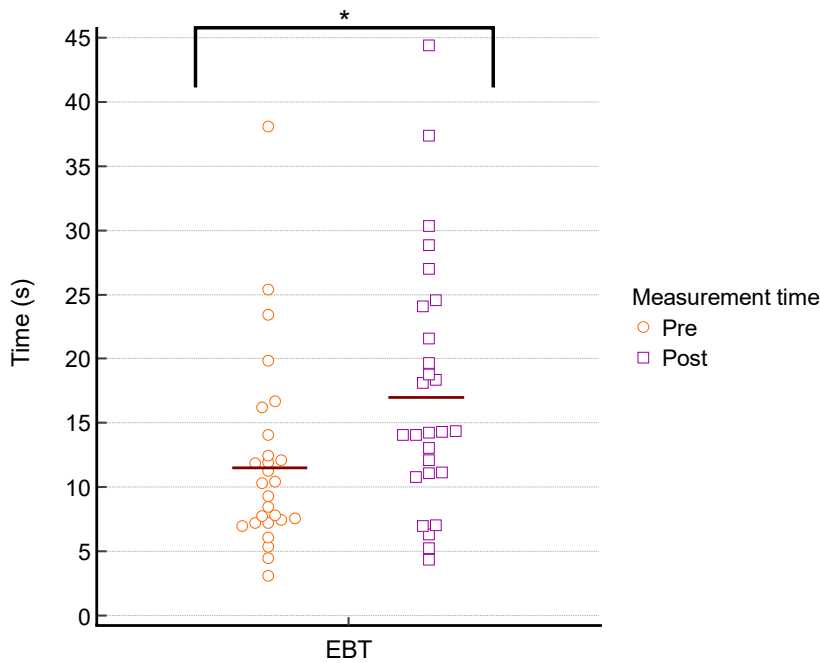

The connector with the asterisk (\*) represents the existence of statistically significant differences between the pre- and post-intervention measurement. The horizontal line of each group of circles/squares represents the mean value. EBT: Emery balance test

**Supplementary Appendix 2.2** Individual values for modified Star Excursion Balance Test (dominant lower limb).

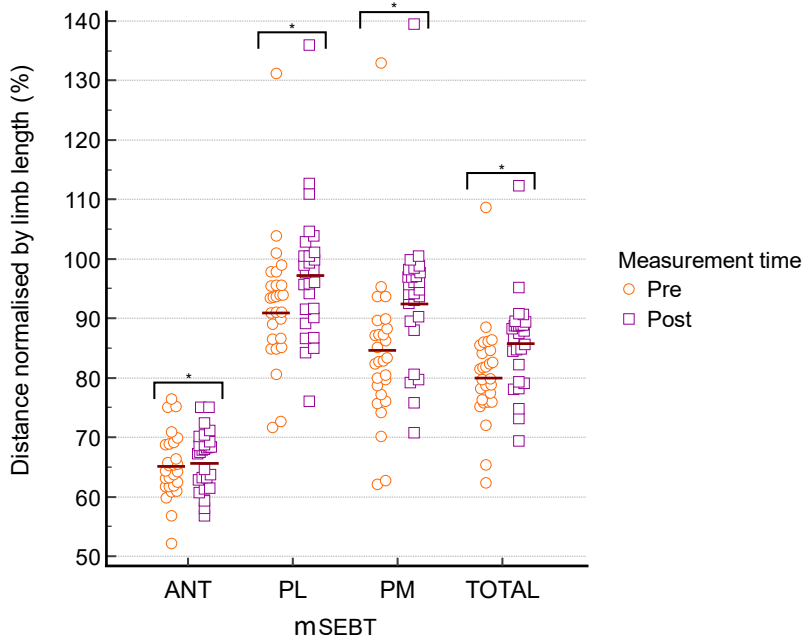

The connector with the asterisk (\*) represents the existence of statistically significant differences between the pre- and post-intervention measurement. The horizontal line of each group of circles/squares represents the mean value. mSEBT: modified Star Excursion Balance Test; ANT: anterior; PM: posteromedial; PL: posterolateral

**Supplementary Appendix 2.3** Individual values for area values of Stabilometry (dominant lower limb).

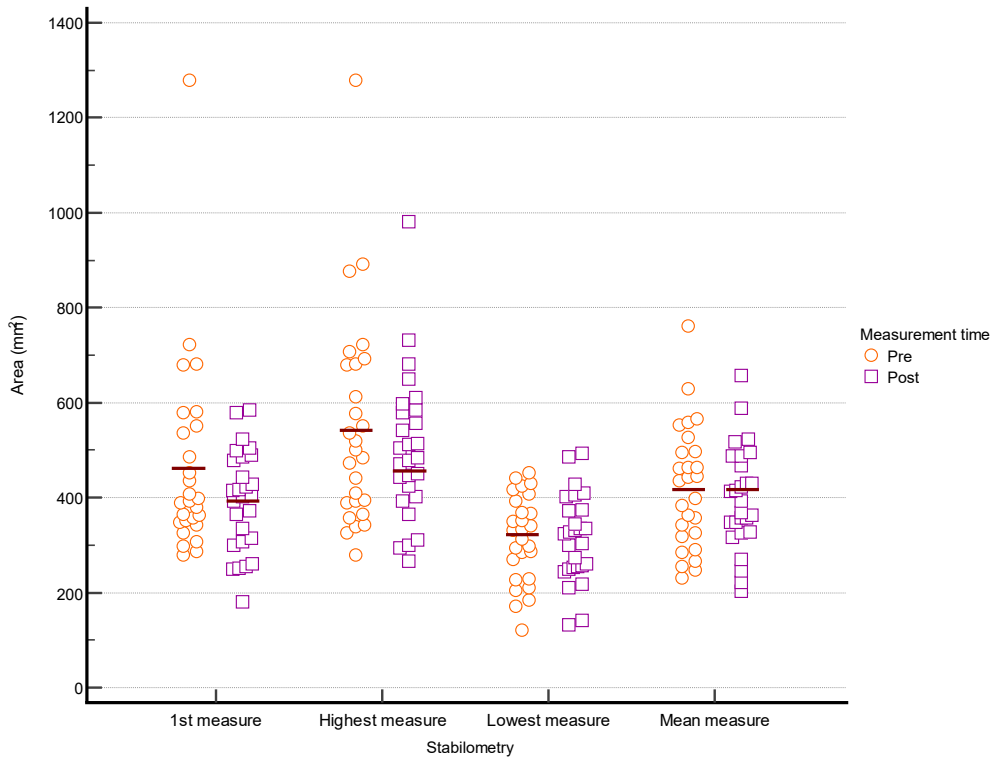

*The horizontal line of each group of circles/squares represents the mean value.*

**Supplementary Appendix 2.4** Individual values for velocity values of Stabilometry (dominant lower limb).

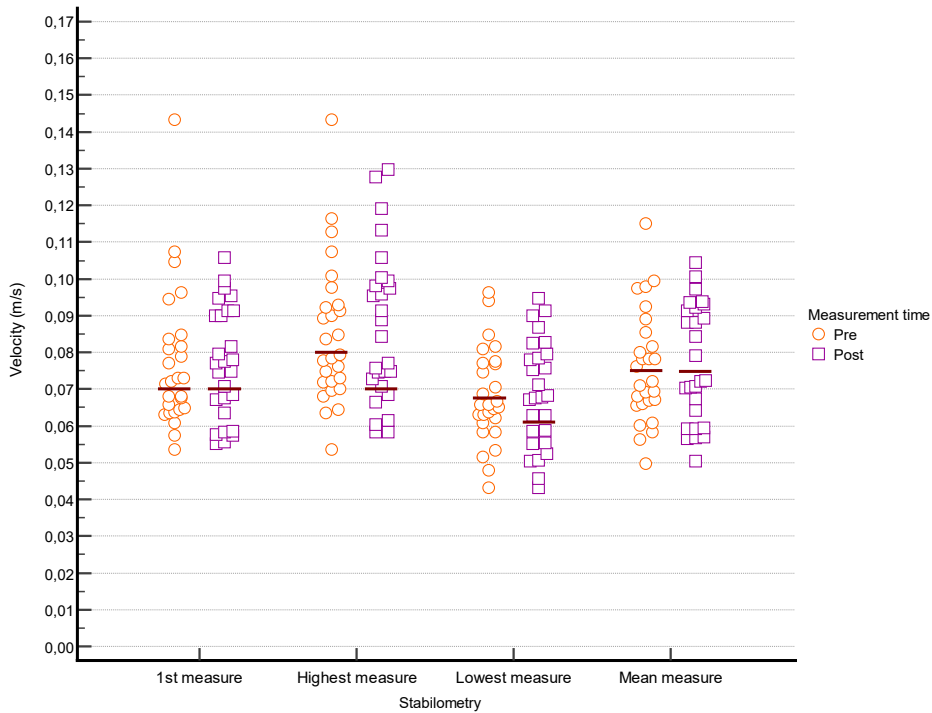

*The horizontal line of each group of circles/squares represents the mean value.*

**Supplementary Appendix 2.5** Individual values for X mean values of Stabilometry (dominant lower limb).

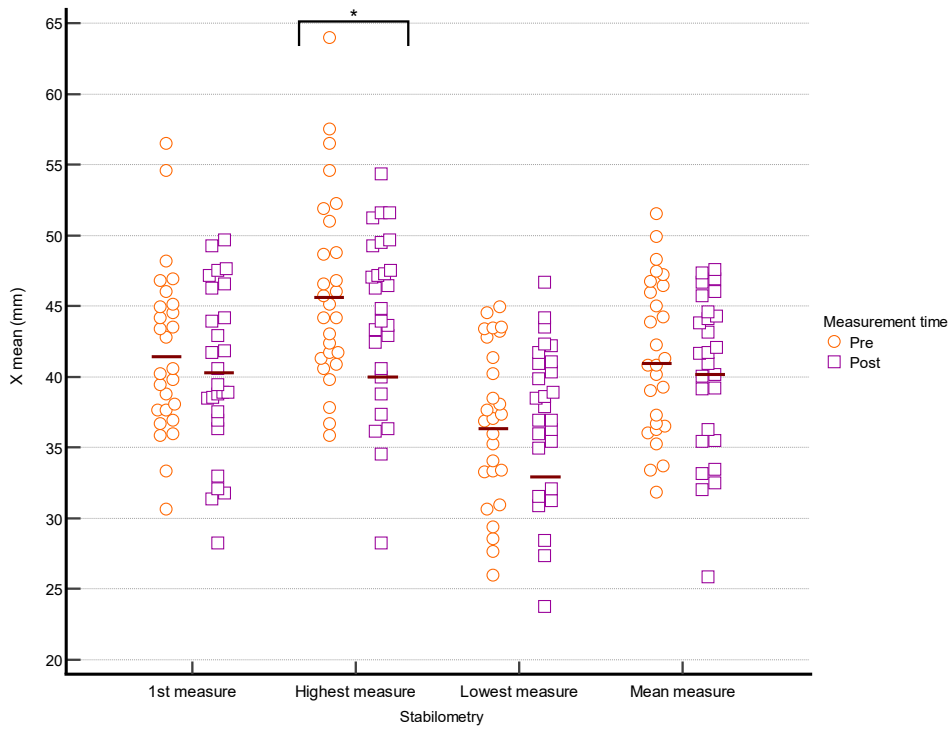

The connector with the asterisk (\*) represents the existence of statistically significant differences between the pre- and post-intervention measurement. The horizontal line of each group of circles/squares represents the mean value.

**Supplementary Appendix 2.6** Individual values for Y mean values of Stabilometry (dominant lower limb).

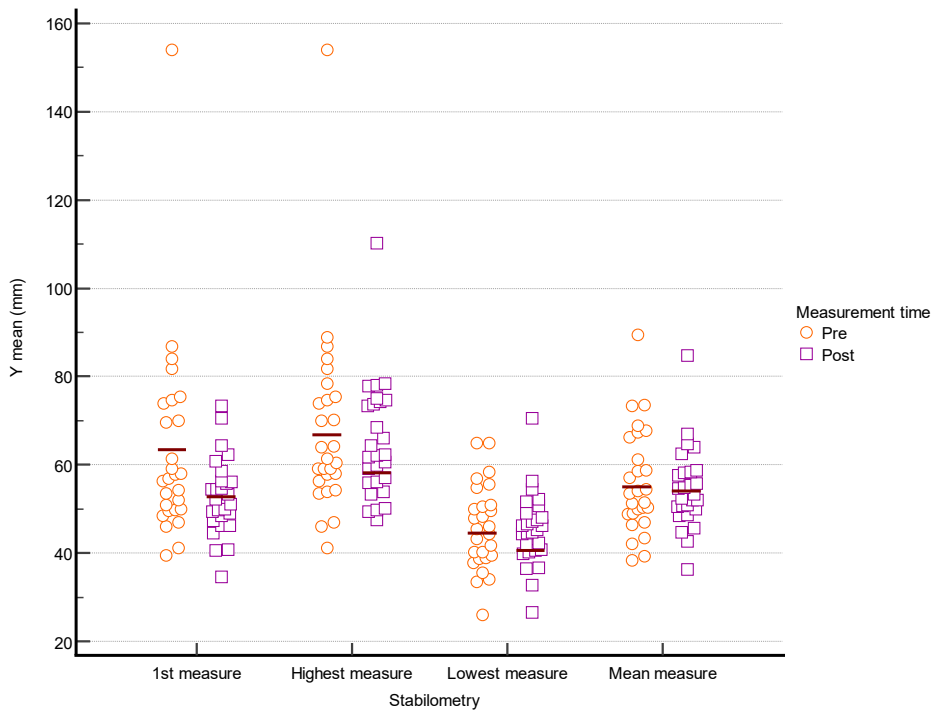

The horizontal line of each group of circles/squares represents the mean value.
